# Supplementary material for: Validation of a Gene-Expression Approach for the Cytological Diagnosis of Epithelioid and Biphasic Pleural Mesothelioma on a Consecutive Series
Source: Preprints.org preprint supplement (doi:10.20944/preprints202309.1347.v1), 2023-09-20
Supplement: Supplementary file 1 [file supplementary]

## Sheet: Foglio1
Supplementary table 1: gene expression comparison between pleural effusions from biphasic versus epithelioid mesothelioma
Gene	logFC	AveExpr	t	P.Value	adj.P.Val	B
VEGFA	-1.57645240075509	10.2084953218613	-4.40301041802938	7.10911638537476e-05	0.00831766617088846	1.55009380068212
CFB	-1.95960861533129	10.3864503174156	-3.7347702208975	0.000555494509132768	0.0324964287842669	-0.35486672734805
SULF1	-2.41897197541696	8.5522985839716	-3.44111844483652	0.00131459438209387	0.0467066928546305	-1.14531772630146
MSLN	-2.01138251161703	10.9552612156835	-3.3357058218606	0.00177746911645107	0.0467066928546305	-1.42058707346505
ASS1	-2.29014934102026	9.21370449642704	-3.29203519575727	0.00201155124252116	0.0467066928546305	-1.53321067680291
EEF2	-0.792543369077762	11.375851103433	-3.22995184452352	0.00239521501818618	0.0467066928546305	-1.69184118092462
FGF2	-2.12829874121575	5.35767825227601	-3.11092254604269	0.00333245342082295	0.0556995786051835	-1.99094300941387
PTGIS	-1.37079383760362	9.60939768711993	-2.72192815774112	0.00938074152556208	0.136611549389184	-2.91807698126457
CDKN2B	-2.30197639229723	3.75694990356158	-2.66110696877944	0.0109558288350379	0.136611549389184	-3.05548025781735
CDH11	-1.32317913246766	9.28508892854968	-2.63593608534918	0.0116762008024944	0.136611549389184	-3.11170754574765
MAGED1	-0.951044080109739	10.2372018418175	-2.54692335195879	0.0145864971858567	0.143812328789239	-3.30748664005694
EGFR	-1.55087045786357	8.67671138031842	-2.49729885906669	0.0164830777057563	0.143812328789239	-3.41451936716956
MMP14	-0.885286624864768	9.59421458654617	-2.45845685175186	0.0181211621791436	0.143812328789239	-3.49721687911879
TIMP3	-1.3944297161831	10.7003999717649	-2.45607097829051	0.0182264401603439	0.143812328789239	-3.50226535495908
BUB1	0.958348447602717	6.38416867149967	2.4513256982499	0.0184374780499025	0.143812328789239	-3.51229550195848
CLDN15	-1.37872483890556	8.82196367495879	-2.37512333042771	0.0221434591006344	0.160943996351471	-3.67137691681458
MMP12	1.77827129055361	2.16212367445965	2.3510480690038	0.0234467341993208	0.160943996351471	-3.72084910397854
CDK1	1.37958542565427	4.71664935402557	2.32796499738788	0.0247606148233032	0.160943996351471	-3.76792219418224
KRT5	-2.04150563988682	11.0523189632403	-2.2995237874272	0.0264700583010195	0.162999832695752	-3.82543296578917
NME2	-0.593569190467912	12.4390000180234	-2.25589621589204	0.0292978243463564	0.171392272426185	-3.91259133393709
MKI67	0.930425580421319	6.82096849552241	2.21558733099797	0.0321465191234035	0.179102035116105	-3.99196419923508
BIRC5	0.889670719978434	6.94553138733679	2.17781399196147	0.0350364160746942	0.186330030942692	-4.06532368441972
LAMA3	-1.5125891973634	6.6957931319228	-2.09758337047715	0.0419465778203171	0.2133804176077	-4.21780805861041
ITGB4	-1.46977730786685	10.1231266044743	-2.0702382260668	0.0445609618861669	0.215123123357388	-4.26872887588919
CDH1	-1.69370850325989	8.59563337936353	-2.03912799997082	0.0477074125897874	0.215123123357388	-4.32600214201399
CDKN2A	-1.48866514573104	2.19204959118428	-2.03819070666711	0.047805138523864	0.215123123357388	-4.32771673460541
CDK4	-0.5408016996833	7.1829004978813	-2.01155644357644	0.050655873609753	0.219508785642263	-4.37616973503679
TOP2A	0.923163532970873	6.32128973970796	1.96242097243015	0.0563032281292394	0.221154903573695	-4.46418234265862
PLK1	0.864645704629051	6.02028314670182	1.95925032586423	0.0566856098959429	0.221154903573695	-4.46979998242963
MAD2L1	0.833117118542346	6.4710229812777	1.95907858628737	0.0567063855317167	0.221154903573695	-4.47010404994322
HEG1	-0.79269050028755	10.2933979353239	-1.93334536260318	0.0598944265715597	0.226053158350725	-4.51541519451071
NDC80	0.98161581155375	5.54780490329752	1.89102519858583	0.0654720733890176	0.239382268328595	-4.5888460432154
LAMC1	-0.710562753867961	9.30146008245502	-1.82832908720231	0.0745469272179124	0.25930437568795	-4.69511754195919
CCNO	-1.24437248534492	3.38094780757801	-1.81215561443705	0.0770537172497745	0.25930437568795	-4.72203955079966
CXADR	-1.13569856324868	9.34061527663386	-1.79665516089416	0.0795225928559235	0.25930437568795	-4.74765014758496
DSP	-1.07667284418033	9.41702918511176	-1.79502567043312	0.0797859617501384	0.25930437568795	-4.75033157280039
SOD1	-0.374238582971481	7.1729530175731	-1.73878712293978	0.089335406094484	0.278443580491398	-4.84159689104009
CCNB2	0.872571614199015	6.12709467940772	1.73264065206218	0.0904346671681464	0.278443580491398	-4.85142006149037
TERT	1.20536337618689	1.31812233797933	1.69594617314112	0.0972340238072725	0.291702071421817	-4.90943826783848
EIF4G1	-0.346179323835452	9.42112626766236	-1.65478696526249	0.10535874477836	0.308174328476704	-4.97323042642491
EGR3	0.971349479455785	7.21123176977103	1.63937414937645	0.108541391485071	0.309740068384227	-4.99676616961617
THBS2	-1.16064787562473	8.93687076179097	-1.58042086779477	0.121448753966544	0.3383215289068	-5.08500108284382
BMP1	-0.635446558318341	8.96070210488812	-1.52215053207671	0.135401314982293	0.36668993067853	-5.16939905288946
CAV1	-0.782742132155467	8.23176428653079	-1.51222755587017	0.1379004867509	0.36668993067853	-5.1834898210647
ITGA3	-0.706382549223531	10.2748969508213	-1.48195403235711	0.145753129631581	0.378557425532581	-5.22596867768112
LGALS3BP	-0.5645727357509	10.2499550267153	-1.46580065434722	0.150085958893191	0.378557425532581	-5.24831901302773
TPPP	1.04559208383189	4.76796538026046	1.45852638558793	0.152070076923344	0.378557425532581	-5.25831193836508
CENPF	0.65888041856542	6.20575137645488	1.3339968609421	0.189332096875456	0.461496986133924	-5.42237758425531
ADAMTS8	-0.996536793318375	2.09929457859443	-1.29165343428225	0.203479804665262	0.478397942278828	-5.47511320236207
MICAL2	-0.527983662886919	10.1444679985841	-1.28000774038897	0.207507320136936	0.478397942278828	-5.48934239871727
CTNNA1	-0.253538759788139	10.3428825034371	-1.26886235823297	0.211417619800492	0.478397942278828	-5.502848876216
PAPPA	-0.850250877114461	5.5519253528817	-1.24630883422999	0.219498727627272	0.478397942278828	-5.52984595566367
DNMT1	0.419452270624007	8.90875010806773	1.24176808861816	0.221153135720969	0.478397942278828	-5.53522709057616
ITGA5	0.483482533560587	9.26437744932459	1.22521934160644	0.227260967332432	0.478397942278828	-5.55468436164886
MCM4	-0.378732668568653	7.77151739860114	-1.21700620764905	0.230338138914358	0.478397942278828	-5.56425093770349
ADCY4	0.591058704967391	4.53051487509838	1.2169328515593	0.230365760432189	0.478397942278828	-5.56433611257128
Gli2	-1.10502065880797	6.1673304637411	-1.19711748858047	0.237916601378834	0.478397942278828	-5.58716896891502
GALNT7	-0.507931397932218	7.04647755817593	-1.18140919848007	0.244029836358564	0.478397942278828	-5.60502093665747
RAD21	-0.319614361862303	11.0170014656004	-1.17292396991737	0.247379209199794	0.478397942278828	-5.6145725146585
AURKA	0.462572708070601	6.17284550905011	1.16832693613873	0.249207659653645	0.478397942278828	-5.61972038123181
MYH11	0.91364951881642	1.43040313501131	1.16158693629089	0.251906122994679	0.478397942278828	-5.62723379732132
Gli1	1.22286621639484	2.93584205357237	1.15760553414738	0.253510020694763	0.478397942278828	-5.63165294741782
ITGA4	0.585502830941367	7.34291203629437	1.13090550651602	0.264456487600192	0.491133476971785	-5.66092091613213
MMP7	0.594067664603034	1.0488022181829	1.11326701455935	0.271870613377939	0.494907714792443	-5.6799038799423
MMP9	0.791460769002903	6.05976567552679	1.1060443423431	0.274948730440246	0.494907714792443	-5.68759605367749
NMU	-1.2393913617927	8.37885261297823	-1.08875809714934	0.282415498707365	0.50064565679942	-5.70581433510519
UBE2T	0.693262496440361	5.05328760639065	1.07256542954789	0.289538013180844	0.505611157345653	-5.72263433188794
LGALS3	-0.331989297578926	10.7986350486941	-1.02373551866765	0.311770548136621	0.523894556821046	-5.77191053194598
PDCD1	0.718162732720749	3.44269810159333	1.02199047463443	0.312586108909704	0.523894556821046	-5.77363120906907
NF2	-0.450948350659735	8.49467608942138	-1.02016420650727	0.313441187841652	0.523894556821046	-5.77542898886743
GNAQ	-0.258920680787825	8.84592078594683	-0.996022888733343	0.324894219190097	0.535389065425935	-5.79890620326285
ACSL1	-0.401489503449627	9.77099545657799	-0.98481950377849	0.330303975338679	0.536503638725108	-5.80961945153028
ESR2	0.81287662763619	2.44051372640101	0.975720914857877	0.334741586554982	0.536503638725108	-5.81823493028792
COL1A1	-0.572951123042292	10.3961629132452	-0.910985936243162	0.367457284683854	0.579475639962526	-5.87732301322889
EMX2	0.825461985520018	2.20241149210033	0.891512757815846	0.377689767330465	0.579475639962526	-5.89433619560653
PDGFRB	0.696125456149646	4.34599008934421	0.870108838541448	0.389144469220714	0.579475639962526	-5.91262809227475
SMARCA4	-0.218521025355875	8.85187788629106	-0.868307488461439	0.390118389087705	0.579475639962526	-5.91414800076757
FN1	-0.570848669755576	11.3375263864879	-0.865376550959435	0.39170630947425	0.579475639962526	-5.91661452185582
FANCI	-0.296137144093592	5.74060014353679	-0.861268684458872	0.393938690962647	0.579475639962526	-5.92005795145073
CHEK1	0.397421368831291	6.54827231415671	0.8570809670026	0.396222659803437	0.579475639962526	-5.92355205010236
SDC1	0.640949579155307	5.02985885355824	0.84514173144022	0.402779613189152	0.581792774606553	-5.93342353833221
PLK2	-0.427639843492583	10.4884243773656	-0.804239137248611	0.425748996476967	0.607471129119575	-5.96622699509885
SELE	0.567097576814266	1.27757885327827	0.720919484253731	0.474918676504115	0.669463676517849	-6.0281606967034
TNPO2	-0.292100069252113	6.797336349631	-0.698838848555459	0.488471700666387	0.673967539848869	-6.04346874160222
SERPINE1	-0.374126447601122	9.03750591432495	-0.691549910040075	0.492992612097511	0.673967539848869	-6.0484199554725
MMP1	0.700096366709237	3.0567752696674	0.687691800509486	0.495394943820536	0.673967539848869	-6.05102015769141
CD274	-0.50652819724184	3.81003308766977	-0.6684066372198	0.507499746259784	0.682499658763158	-6.06380430626119
COL16A1	0.538472302670137	3.08336349069421	0.640710557973717	0.525161519230825	0.688784292777862	-6.08154136487102
MMP10	-0.331497309211343	0.961695183618818	-0.637754546842387	0.52706563751516	0.688784292777862	-6.08339101637611
ITGA7	0.460729044277708	3.41005485937293	0.633466793080344	0.529834071367586	0.688784292777862	-6.08605906937969
SDHB	0.130365638465522	9.12602232296448	0.617792816888839	0.54001888443056	0.694309994267863	-6.09566195404607
TUBB2B	0.498805255674829	4.64376818014557	0.553719662148953	0.582681619963671	0.737541319302077	-6.13245755511441
PTGS2	-0.358837337742769	6.77572069872109	-0.548466091516294	0.586250792265754	0.737541319302077	-6.1352987927531
ITGAM	0.263583777669096	8.66541641506402	0.503570417336942	0.617171821742884	0.768181948339548	-6.15848943351704
PECAM1	-0.290510460799696	7.98554961536221	-0.471408831461217	0.639767533416584	0.787924225365688	-6.17390020505451
PCNA	0.138446980884554	7.56339377231993	0.461257639190657	0.646973293112002	0.788498700980252	-6.17855553249632
CCNB1	0.1604573337447	7.80923951038652	0.433909376671175	0.666556020852909	0.793320819506325	-6.19059811793648
PPARA	0.152846836181363	6.61319524859171	0.431346085861402	0.668403862737169	0.793320819506325	-6.19168948047784
PKM	0.0678148496927103	12.3768155525391	0.427373910462477	0.671271462659198	0.793320819506325	-6.19336803911829
JAG1	-0.206021834153271	5.65330329760712	-0.392331996971224	0.69677986497621	0.815232442022165	-6.20750877709401
CDK7	-0.109662570694113	7.4096489156075	-0.341814305576445	0.734180460772599	0.850486276340535	-6.22578136087909
COL4A2	-0.26713845725865	6.88747499414884	-0.278030592150623	0.782341322478341	0.889744256934703	-6.24527853941781
CD44	-0.0989887596346443	12.170629315956	-0.276800811256358	0.783279132173285	0.889744256934703	-6.2456151908331
PIK3CA	-0.0863479672264553	8.25891657469155	-0.25472080679982	0.800171188168098	0.90019258668911	-6.25140650968461
JUNB	-0.077006216788178	10.3262522175416	-0.193378733341436	0.847586536919899	0.93138311262359	-6.26497707603391
MCM2	-0.064455439840396	6.7944547001915	-0.191679647763958	0.848908919724958	0.93138311262359	-6.26530019009794
TACC1	0.0508545961405212	9.79704282620823	0.167816823419231	0.867525949072942	0.93138311262359	-6.26953739442659
VWF	0.0873571932937025	1.11105965445096	0.157010746359358	0.875982282604077	0.93138311262359	-6.27127138969841
MMP3	0.148352888372681	2.51643368486945	0.155140477787494	0.877447386683896	0.93138311262359	-6.27155980458451
IFITM1	0.0795399799078859	9.92505237381915	0.142030671458718	0.887729080484258	0.93138311262359	-6.27348455891994
BAP1	-0.0666015574918794	8.87367357375899	-0.141465049527904	0.888173137536074	0.93138311262359	-6.27356378471845
DNMT3A	-0.0420134099122445	8.50366905359421	-0.134637403040014	0.893536195764656	0.93138311262359	-6.27449520567661
TGFBR2	-0.0344367079601883	9.94927985910198	-0.117601734414276	0.906939026926838	0.93138311262359	-6.27661849476708
SFRP1	0.106810286127204	2.65870003677627	0.116887608430988	0.90750149435119	0.93138311262359	-6.27670124306575
NOTCH1	-0.0135062477375374	7.46755646562865	-0.0393617601864202	0.968786877422142	0.985635344855571	-6.28268799152377
PAK4	-0.00844370700142378	7.52145780340345	-0.023243241578815	0.981565381418807	0.990027151948279	-6.28318679551385
XPOT	-0.00262124776318097	8.27506254122942	-0.00872502697269522	0.993079481656403	0.993079481656403	-6.28341621795551
